# Supplementary material for: Complementary lateral hypothalamic populations resist hunger pressure to balance nutritional and social needs
Source: PubMed Central journal article supplement — Cell Metab. 2023 Mar 7;35(3):456–471.e6. doi: 10.1016/j.cmet.2023.02.008 (PMC10028225; doi:10.1016/j.cmet.2023.02.008), 2023-03-07
Supplement: mmc1.pdf [file mmc1.pdf]

**Cell Metabolism, Volume 35**

**Supplemental information**

**Complementary lateral hypothalamic  
populations resist hunger pressure  
to balance nutritional and social needs**

**Anne Petzold, Hanna Elin van den Munkhof, Rebecca Figge-Schlensook, and Tatiana Korotkova**

# **Complementary lateral hypothalamic populations resist hunger pressure to balance nutritional and social needs**

## **Supplemental information**

Supplemental Figures 1-8

**Figure S1**

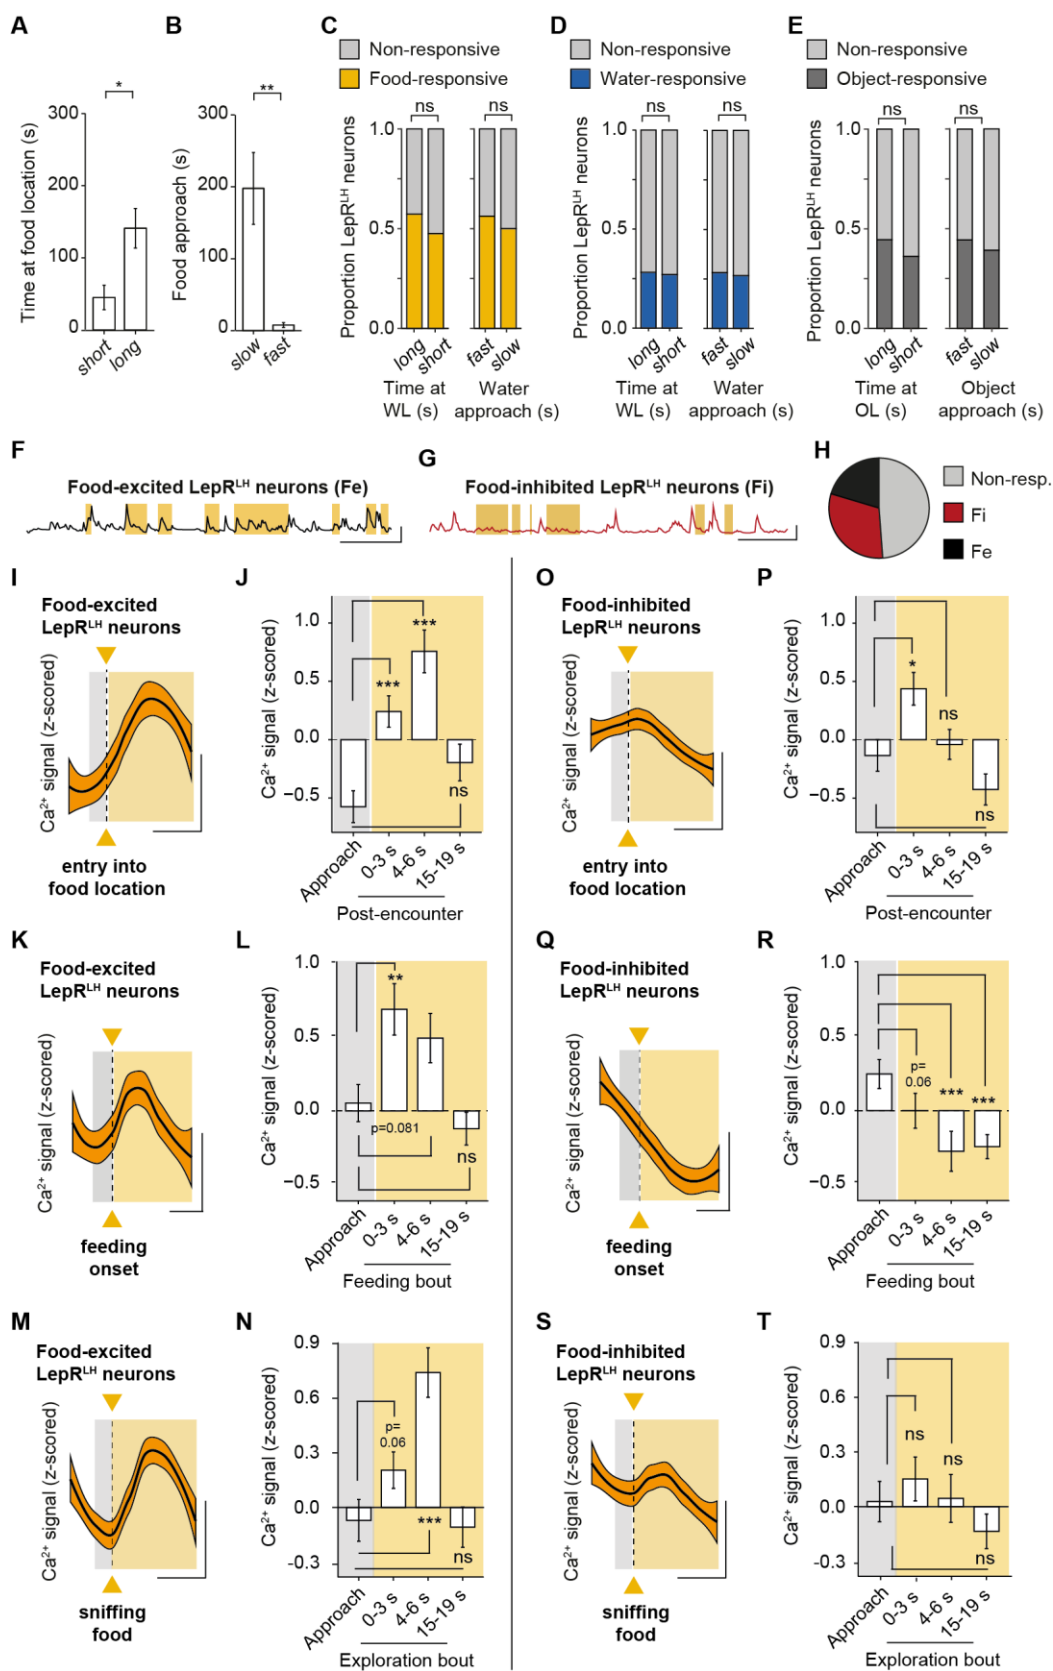

**Figure S1. Encoding of feeding-related behaviors by LepR<sup>LH</sup> neurons. Related to Fig. 1.**

(A,B) Foraging performance parameters.

(A) Time spent at food location (FL) by mice spending a “short” and those spending a “long” time at FL. Separation based on daily average time spent at FL. n = 5 mice, 3 imaging days, \* P = 0.021, Student’s t-test.

(B) Time to approach the FL by mice approaching “fast” and those approaching “slowly”. Separation based on daily average time to approach the FL. n = 5 mice, 3 imaging days, \*\* P = 0.0094, Mann-Whitney U test.

(C) Proportion of food-responsive neurons. Left: in mice spending a long or short time at water location (WL); right: in mice exhibiting fast and slow water approach. Total: n = 510; food-responsive: n = 261 neurons. 5 mice, 3 imaging days, ns, Pearson’s  $\chi^2$  test.

(D) Proportion of water-responsive neurons in mice according to water seeking performance. n = 240 neurons, as in (C).

(E) Proportion of object-responsive neurons in mice according to object exploration performance. n = 254 neurons, as in (C).

(F,G) Representative Ca<sup>2+</sup> traces of food-excited (Fe) and food-inhibited (Fi) neurons. Scale bar = 25 s.

(H) Proportion of food-responsive neurons. Fi: n = 157; Fe: n = 104 neurons. 5 mice, 3 imaging days.

(I-N) Ca<sup>2+</sup> signal of food-excited neurons around the onset of feeding-related behaviors, n = 43 neurons. ns P > 0.05, \*\* P < 0.0098, \*\*\* P < 0.001, Mann-Whitney U test.

(O-T) Ca<sup>2+</sup> signal of food-inhibited neurons around the onset of feeding-related behaviors, n = 51 neurons. ns P > 0.05, \* P = 0.022, \*\*\* P < 0.001, Mann-Whitney U test.

(I-T) Scale bar: x = 5 s, y = 0.4 SD.

Data shown are mean  $\pm$  SEM. ns – not significant, \* P < 0.05, \*\* P < 0.01, \*\*\* P < 0.001.

---

**Figure S2**

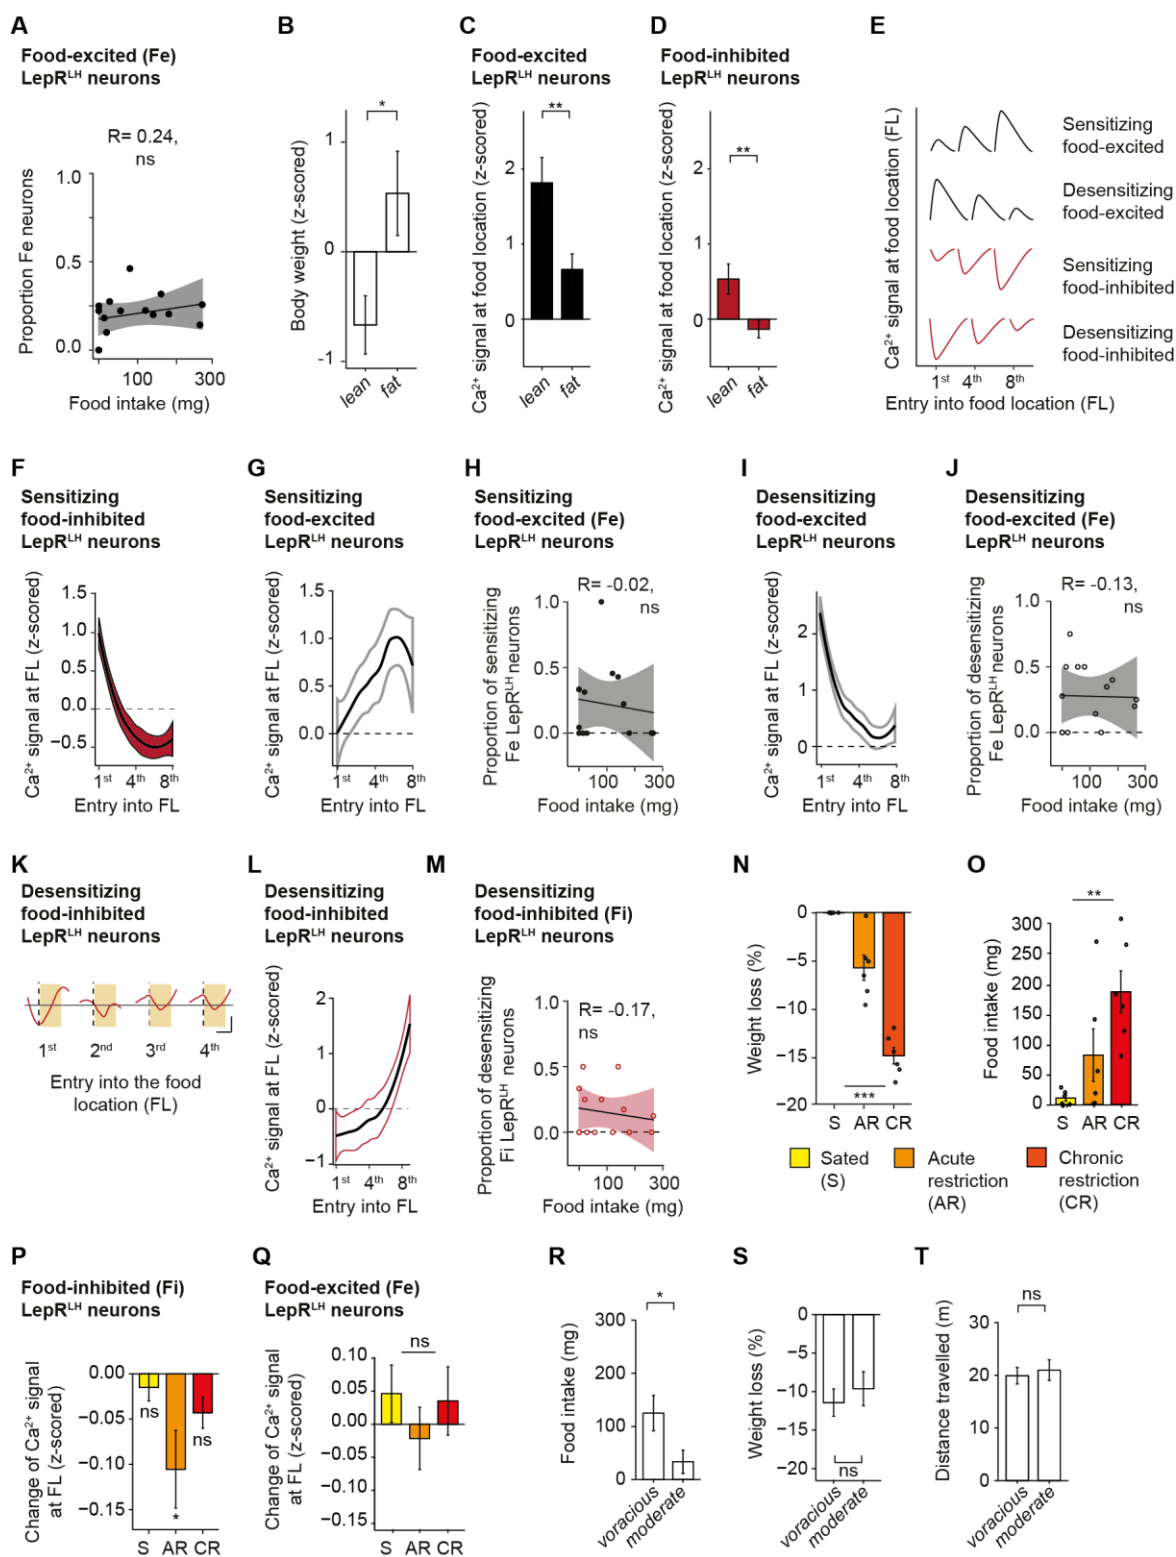

**Figure S2. State-dependent food-elicited inhibition by LepR<sup>LH</sup> neurons. Related to Fig. 1.**

(A) Proportion of food-excited (Fe) neurons and food intake.  $n = 104$  neurons, 5 mice, 3 imaging days, ns, Pearson's correlation.

(B) Weight categories, \*  $P = 0.047$ , Student's t-test.

(C)  $\text{Ca}^{2+}$  signal at food location (FL) in Fe neurons, fat:  $n = 44$ , lean:  $n = 15$  neurons, \*\*  $P = 0.0022$ , Mann-Whitney U test.

(D) As in (C) for food-inhibited (Fi) neurons, fat:  $n = 44$ , lean:  $n = 25$  neurons, \*\*  $P = 0.0024$ .

(E) Schematic illustrating types of food-related responses of stimulus-responsive neurons.

(F) Sensitizing food-inhibited (Fi) population:  $\text{Ca}^{2+}$  signal during consecutive food location (FL) visits,  $n = 33$  neurons, 5 mice, 3 imaging days, local fit.

(G,H) Sensitizing food-excited (Fe) population,  $n = 28$  neurons, 5 mice, 3 imaging days. (G)  $\text{Ca}^{2+}$  signal as in (F). (H) Proportion and food intake, ns, Pearson's correlation.

(I,J) Desensitizing Fe neurons,  $n = 31$  neurons, 5 mice. (I)  $\text{Ca}^{2+}$  signal as in (F). (J) As in (H), ns.

(K-M) Desensitizing Fi population,  $n = 11$  neurons, 5 mice. (K) Example of  $\text{Ca}^{2+}$  signal during consecutive FL visits, scale bar:  $x = 5$  s,  $y = 0.2$  SD. (L)  $\text{Ca}^{2+}$  signal as in (F). (M) As in (H), ns.

(N) Weight loss across states.  $n = 6$  mice,  $F(2, 5) = 44.8$ , \*\*\*  $P < 0.001$ , ANOVA.

(O) Food intake across states.  $n = 6$  mice,  $F(2, 5) = 8.2$ , \*\*  $P = 0.0079$ , ANOVA.

(P) Change of  $\text{Ca}^{2+}$  signal among Fi population, overall: \*  $P = 0.042$ ,  $F(2, 154) = 3.24$ , ANOVA; *post hoc* comparisons: (S) ns, (AR) \*  $P = 0.013$ , (CR) ns.

(Q) Change of  $\text{Ca}^{2+}$  signal among Fe population. ns,  $F(2, 101) = 0.66$ , as in (P).

(R-T) Feeding, body weight, and locomotion in "voracious" and "moderate" feeders following food restriction. Separation based on daily average food consumption,  $n = 5$  mice, 2 imaging days.

(R) Food intake, \*  $P = 0.028$ , Student's t-test. (S) Weight loss, ns. (T) Locomotion, ns.

Data shown are mean  $\pm$  SEM. ns – not significant, \*  $P < 0.05$ , \*\*  $P < 0.01$ , \*\*\*  $P < 0.001$ .

---

**Figure S3**

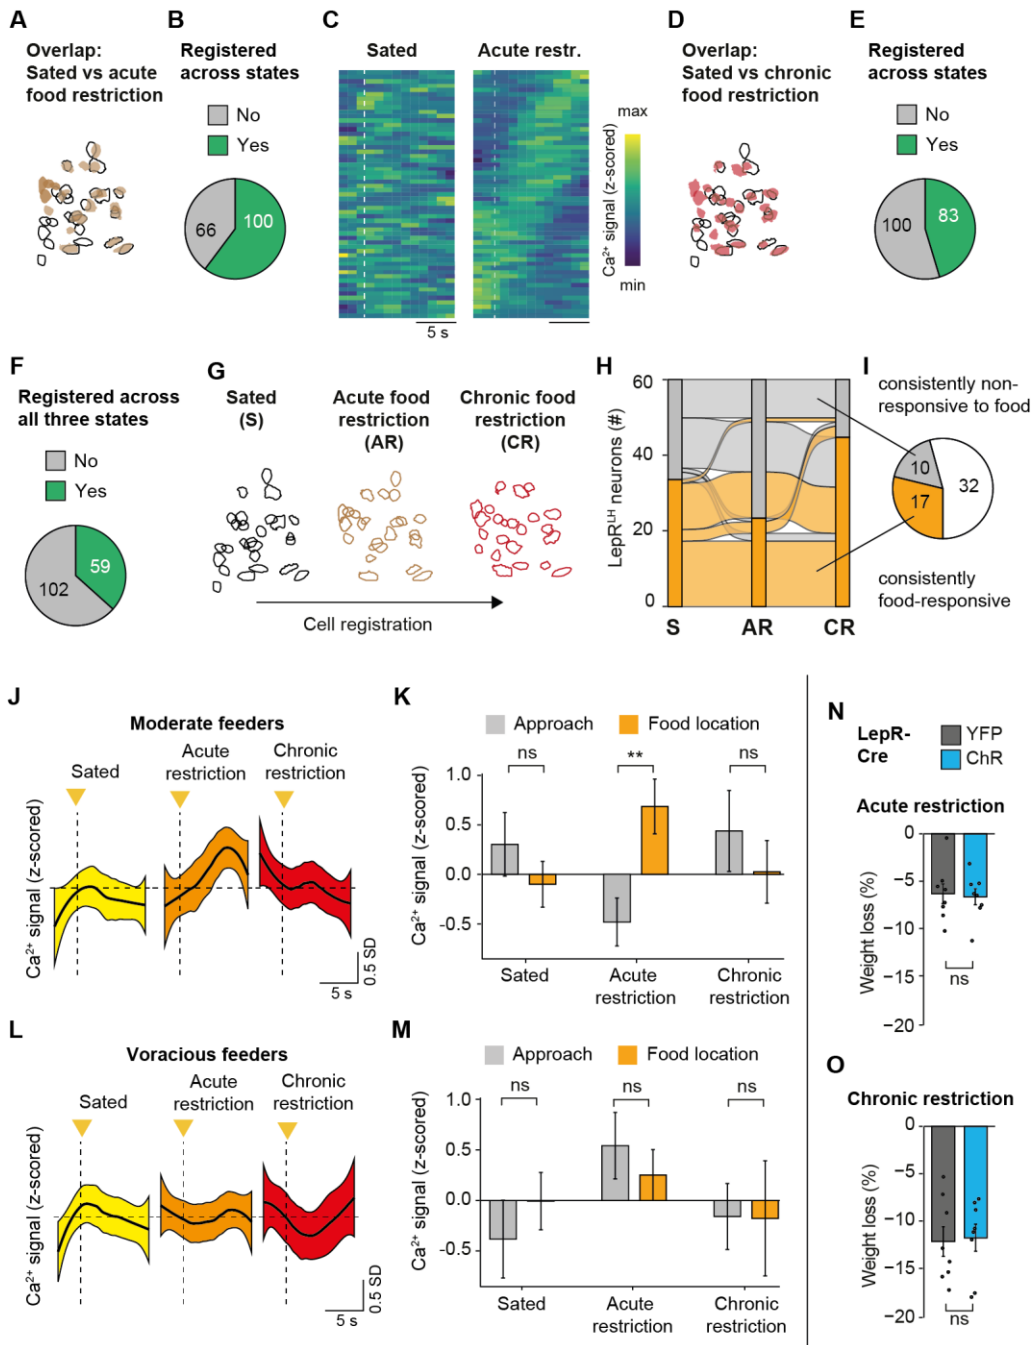

**Figure S3. State-dependent food-related excitation of LepR<sup>LH</sup> neurons restrains feeding. Related to Fig. 1.**

(A-C) Registration of cells recorded in the sated state and following acute food restriction.

(A) Overlap of representative cell maps.

(B) Proportion and (C) heatmap of food-elicited responses of cells registered across two states, dashed line indicates entry into the food location, sorted based on peak activity following acute food restriction.

(D,E) Registration of cells recorded in sated state and following chronic food restriction.

(F,G) Registration of cells recorded in three states: sated state, following acute food restriction, and following chronic food restriction.

(H,I) Change of food responses of individual neurons across all three states, n = 59 cells, 5 mice.

(H) Alluvial diagram. (I) Proportion of consistently food-responsive neurons.

(J,K) Food-elicited responses of cells that were food-inhibited during sated state in “moderate” feeders. (J) Local fit, n = 11 neurons, 5 mice. (K) Ca<sup>2+</sup> signal during approach and after entry into food location (FL), ns P > 0.05, \*\* P = 0.0097, Mann-Whitney U test.

(L,M) Food-elicited responses of cells that were food-inhibited during sated state in “voracious” feeders. (L) Local fit, n = 9 neurons, 5 mice. (M) Ca<sup>2+</sup> signal, ns.

(N,O) Weight loss preceding optogenetic stimulation. YFP: n = 8 mice; ChR: n = 8 mice.

(N) Following acute food restriction, ns, Student’s t-test. (O) Following chronic food restriction, ns.

Data shown are mean  $\pm$  SEM. ns – not significant, \* P < 0.05, \*\* P < 0.01, \*\*\* P < 0.001.

---

**Figure S4**

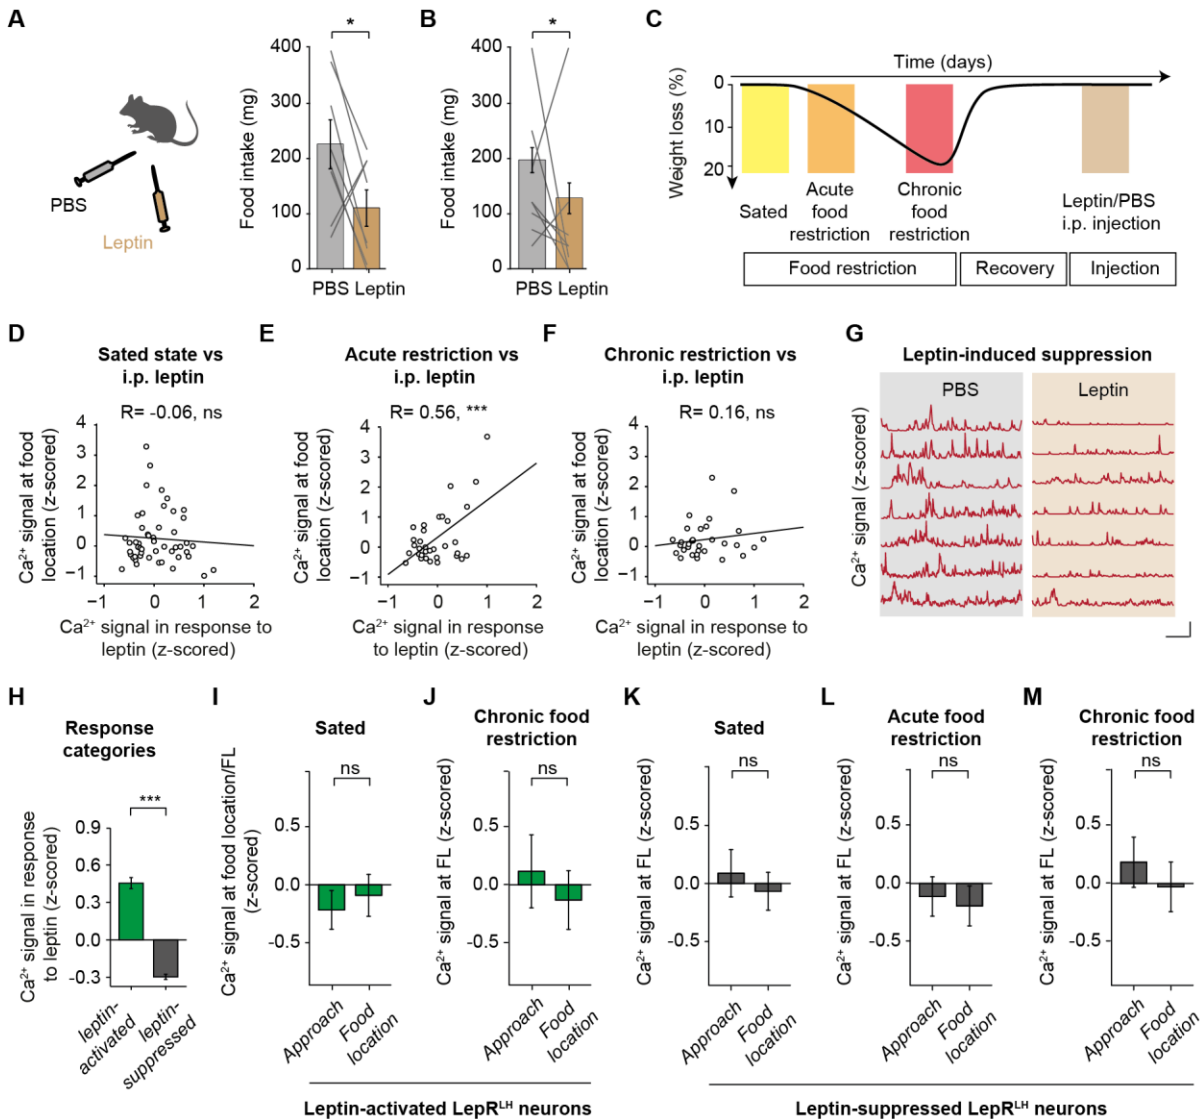

**Figure S4. Relationship between food encoding and leptin sensitivity of LepR<sup>LH</sup> neurons. Related to Fig. 2.**

(A,B) Food intake 30 min (A) and 120 min (B) following i.p. leptin injection, paired Wilcoxon signed-rank test,  $n = 7$  mice.

(C) Experimental regime.

(D-F) Response to leptin injection and  $\text{Ca}^{2+}$  signal at food location (FL) following (D) *ad libitum* access to food,  $n = 49$  neurons, ns, (E) acute food restriction,  $n = 33$  neurons, \*\*\*  $P < 0.001$ , or (F) chronic food restriction,  $n = 32$  neurons, 5 mice, ns, Pearson's correlation.

(G) Representative  $\text{Ca}^{2+}$  traces. Scale bar:  $x = 25$  s,  $y = 0.5$  SD.

(H) Leptin response categories, \*\*\*  $P < 0.001$ , Mann-Whitney U test.

(I,J) Food-elicited responses of leptin-activated neurons recorded following (I) *ad libitum* access to food,  $n = 23$  neurons, or (J) chronic food restriction,  $n = 12$  neurons, 5 mice, ns, paired Wilcoxon signed-rank test.

(K-M) Food-elicited responses of leptin-suppressed neurons recorded following (K) *ad libitum* access to food,  $n = 26$  neurons, (L) acute food restriction,  $n = 20$  neurons, (M) chronic food restriction,  $n = 20$  neurons, 5 mice, ns, paired Wilcoxon signed-rank test.

Data shown are mean  $\pm$  SEM. ns – not significant, \*  $P < 0.05$ , \*\*  $P < 0.01$ , \*\*\*  $P < 0.001$ .

**Figure S5**

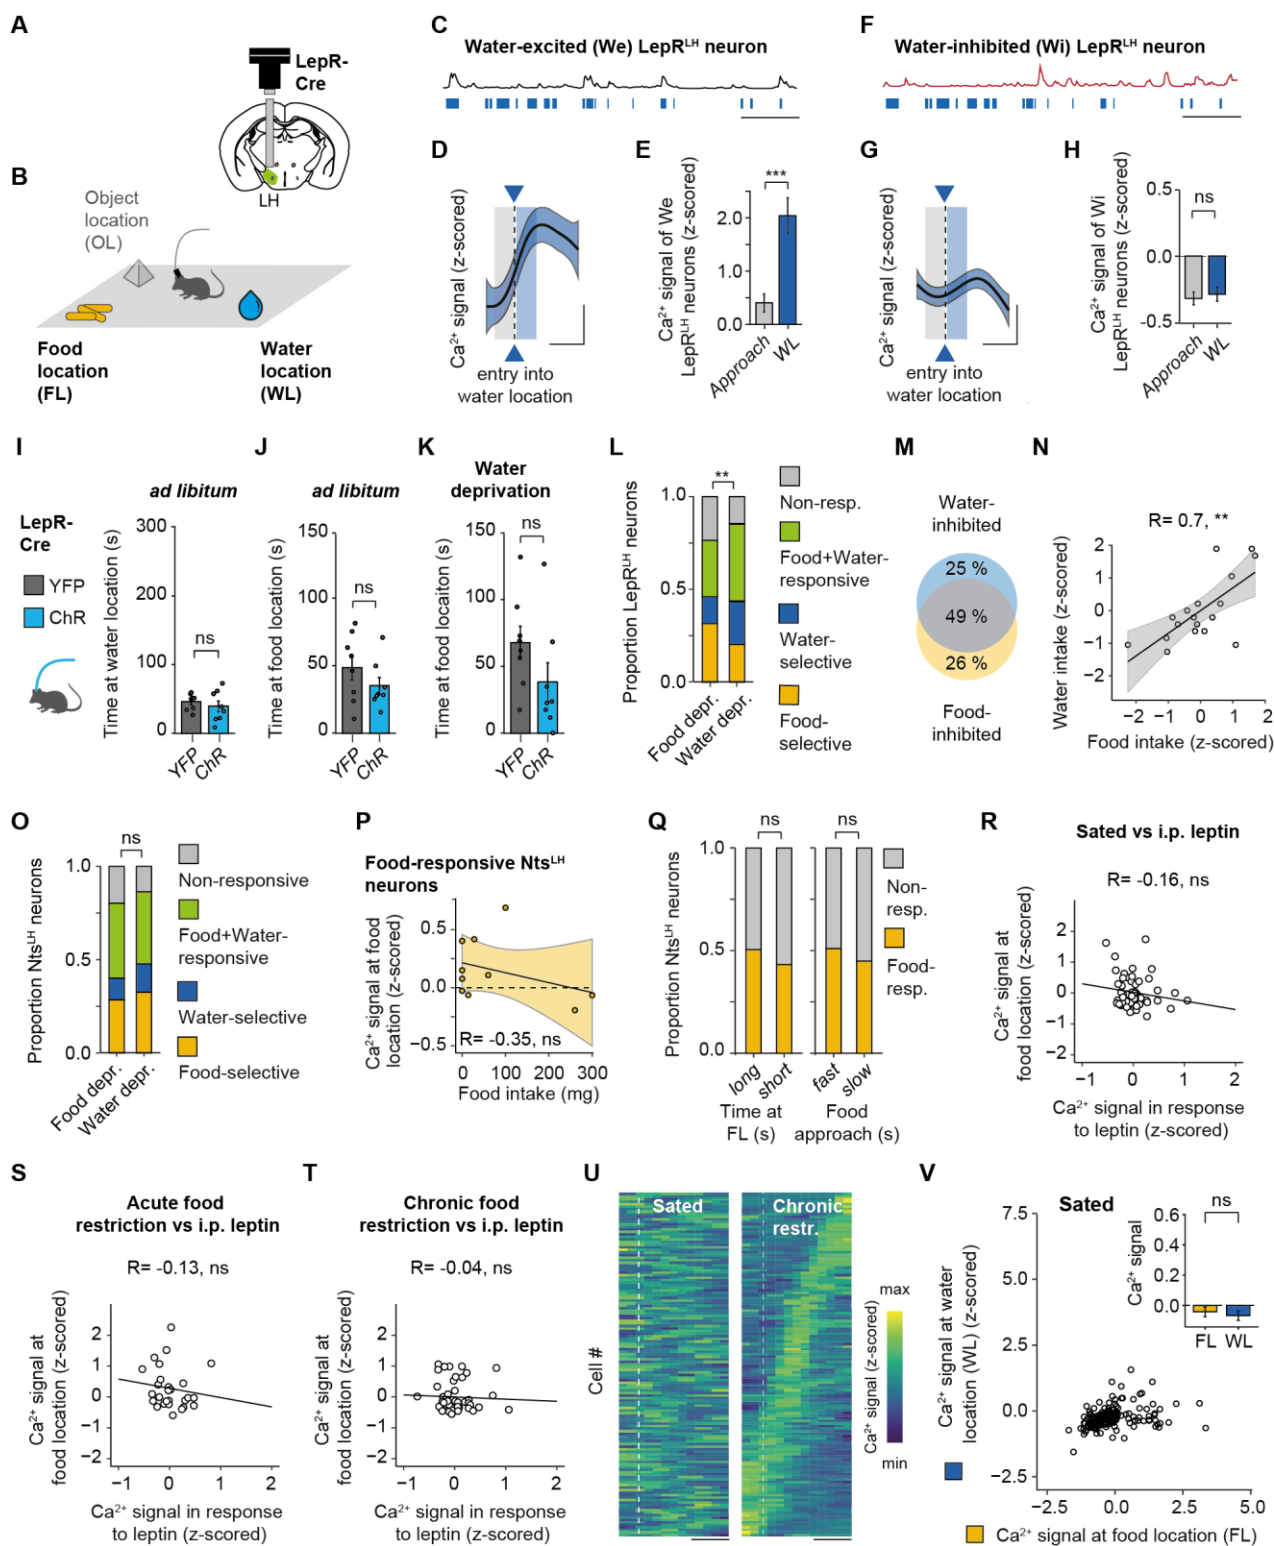

**Figure S5. Need-dependent and need-resistant regulation of drinking by LepR<sup>LH</sup> and Nts<sup>LH</sup> neurons. Related to Figs. 3 and 4.**

- (A) Schema of lens and microendoscope placement.
- (B) Enclosure (30 x 50 cm) with free access to a food (FL), water (WL), and object (OL) location.
- (C-E) Water-excited (We) LepR<sup>LH</sup> neurons following acute water deprivation.
- (C) Representative example. Scale bar: x = 25 s, y = 0.4 SD. (D) Ca<sup>2+</sup> signal around entry (dashed line) into WL, GAM fit. Scale bar: x = 5 s, y = 0.4 SD, n = 34 neurons, 5 mice. (E) Ca<sup>2+</sup> signal during approach and after entry into WL. \*\*\* P < 0.001, paired Wilcoxon signed-rank test.
- (F-H) As in (C-E) for water-inhibited (Wi) LepR<sup>LH</sup> neurons. Scale bar: x = 25 s, y = 0.2 SD. (F) As in C. (G) As in (D), n = 65 neurons, 5 mice. (H) Same as (E), ns.
- (I-K) Time at WL and FL during optogenetic activation following *ad libitum* access to water or acute water deprivation. YFP: n = 8 mice; ChR: n = 8 mice. ns, Mann-Whitney U test.
- (L) Stimulus selectivity of LepR<sup>LH</sup> population, \*\* P = 0.0048, Pearson's  $\chi^2$  test.
- (M) Functional overlap between water-inhibited and food-inhibited LepR<sup>LH</sup> neurons recorded following water or food deprivation and registered across both states, n = 53 neurons.
- (N) Food and water intake. Cumulative intake over 7 h, n = 18 mice, \*\* P = 0.0013, Pearson's correlation.
- (O) Stimulus selectivity of Nts<sup>LH</sup> population. ns, Pearson's  $\chi^2$  test.
- (P) Food intake and average activity of food-responsive Nts<sup>LH</sup> neurons. n = 307 neurons, 4 mice, 3 imaging days. ns, Pearson's correlation.
- (Q) Proportion of food-responsive Nts<sup>LH</sup> neurons. Left: in mice spending a long and short time at food location (FL); right: in mice exhibiting fast and slow food approach. n = 307 neurons, 4 mice, 3 imaging days. ns, Pearson's  $\chi^2$  test.
- (R-T) Response to leptin injection and Ca<sup>2+</sup> signal at FL following (R) *ad libitum* access to food, n = 55 neurons, (S) acute food restriction, n = 27 neurons, or (T) chronic food restriction, n = 48 neurons, 5 mice. ns, Pearson's correlation.
- (U) Heatmap of water-elicited responses of cells registered across sated and acute food restriction state, sorted by peak response following chronic food restriction, dashed line indicates entry into the food location, n = 135 neurons, scale bar = 5 s.
- (V) Ca<sup>2+</sup> signal of individual Nts<sup>LH</sup> neurons in response to food or water in sated state. n = 277 neurons. ns, paired Wilcoxon signed-rank test.

Data shown are mean  $\pm$  SEM. ns – not significant, \* P < 0.05, \*\* P < 0.01, \*\*\* P < 0.001.

**Figure S6**

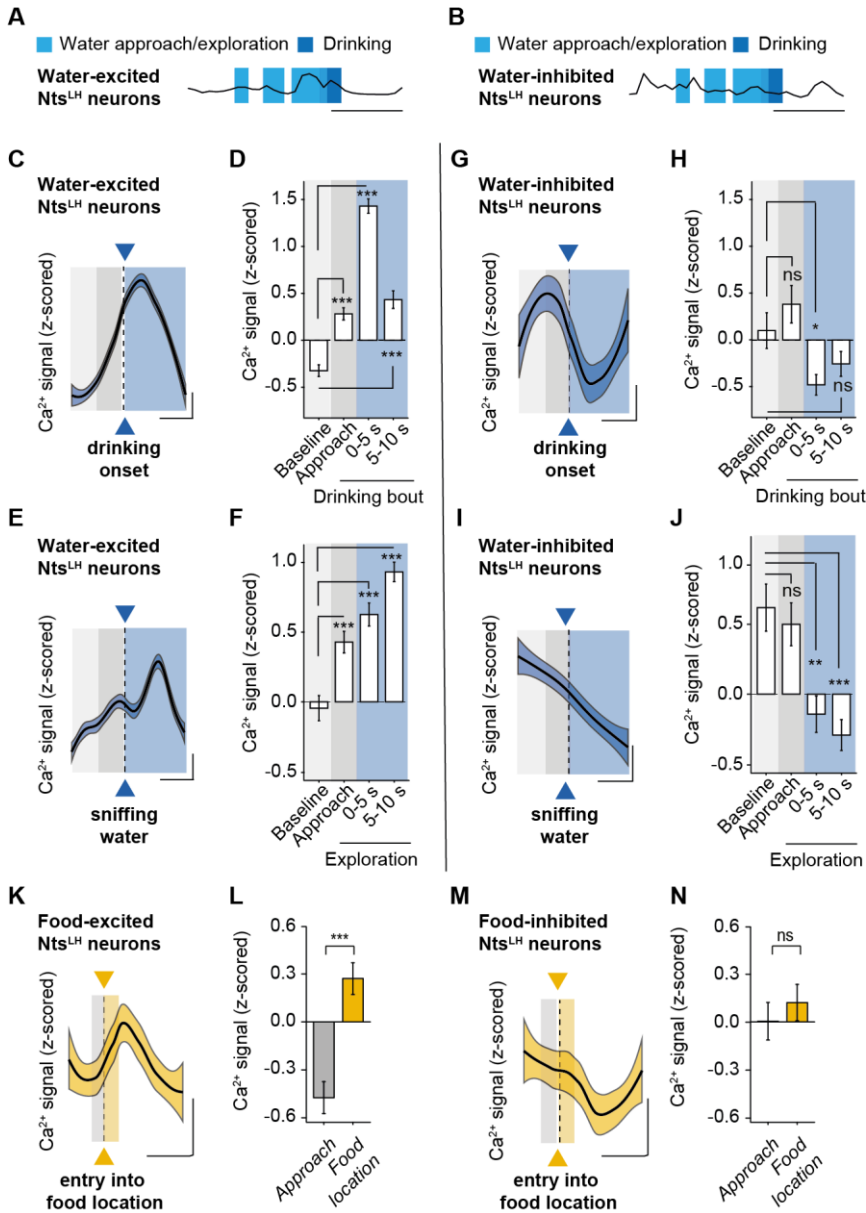

**Figure S6. Encoding of drinking-related behaviors by  $Nts^{LH}$  neurons. Related to Fig. 5.**

(A,B) Representative  $Ca^{2+}$  traces. Scale bar = 25 s.

(C-F)  $Ca^{2+}$  signal of water-excited neurons around the onset of drinking-related behaviors.

(C,D)  $n = 48$  neurons, \*\*\*  $P < 0.001$ . (E,F)  $n = 64$  neurons, \*\*\*  $P < 0.001$ , Mann-Whitney U test.

(G-J)  $Ca^{2+}$  signal of water-inhibited neurons around the onset of drinking-related behaviors.

(G,H)  $n = 11$  neurons, ns  $P > 0.05$ , \*  $P = 0.028$ . (I,J)  $n = 27$  neurons, 2 mice.  $n = 22$  neurons, ns  $P > 0.05$ , \*\*  $P = 0.0011$ , \*\*\*  $P < 0.001$ , Mann-Whitney U test.

(K-N) Food-responsive  $Nts^{LH}$  neurons.

(K,L) Food-excited neurons. (K)  $Ca^{2+}$  signal around entry (dashed line) into FL, local fit, Fe:  $n = 59$ ,

2 mice. (L)  $Ca^{2+}$  signal before and after entry into FL, \*\*  $P = 0.0095$ , paired Wilcoxon signed-rank test.

(M,N) Food-inhibited neurons. (M) As in (K),  $n = 35$  neurons, 2 mice. (N) As in (L), ns.

(C-J) Scale bar:  $x = 5$  s,  $y = 0.5$  SD. (K,M) Scale bar:  $x = 5$  s,  $y = 0.2$  SD.

Data shown are mean  $\pm$  SEM. ns – not significant, \*  $P < 0.05$ , \*\*  $P < 0.01$ , \*\*\*  $P < 0.001$ .

**Figure S7**

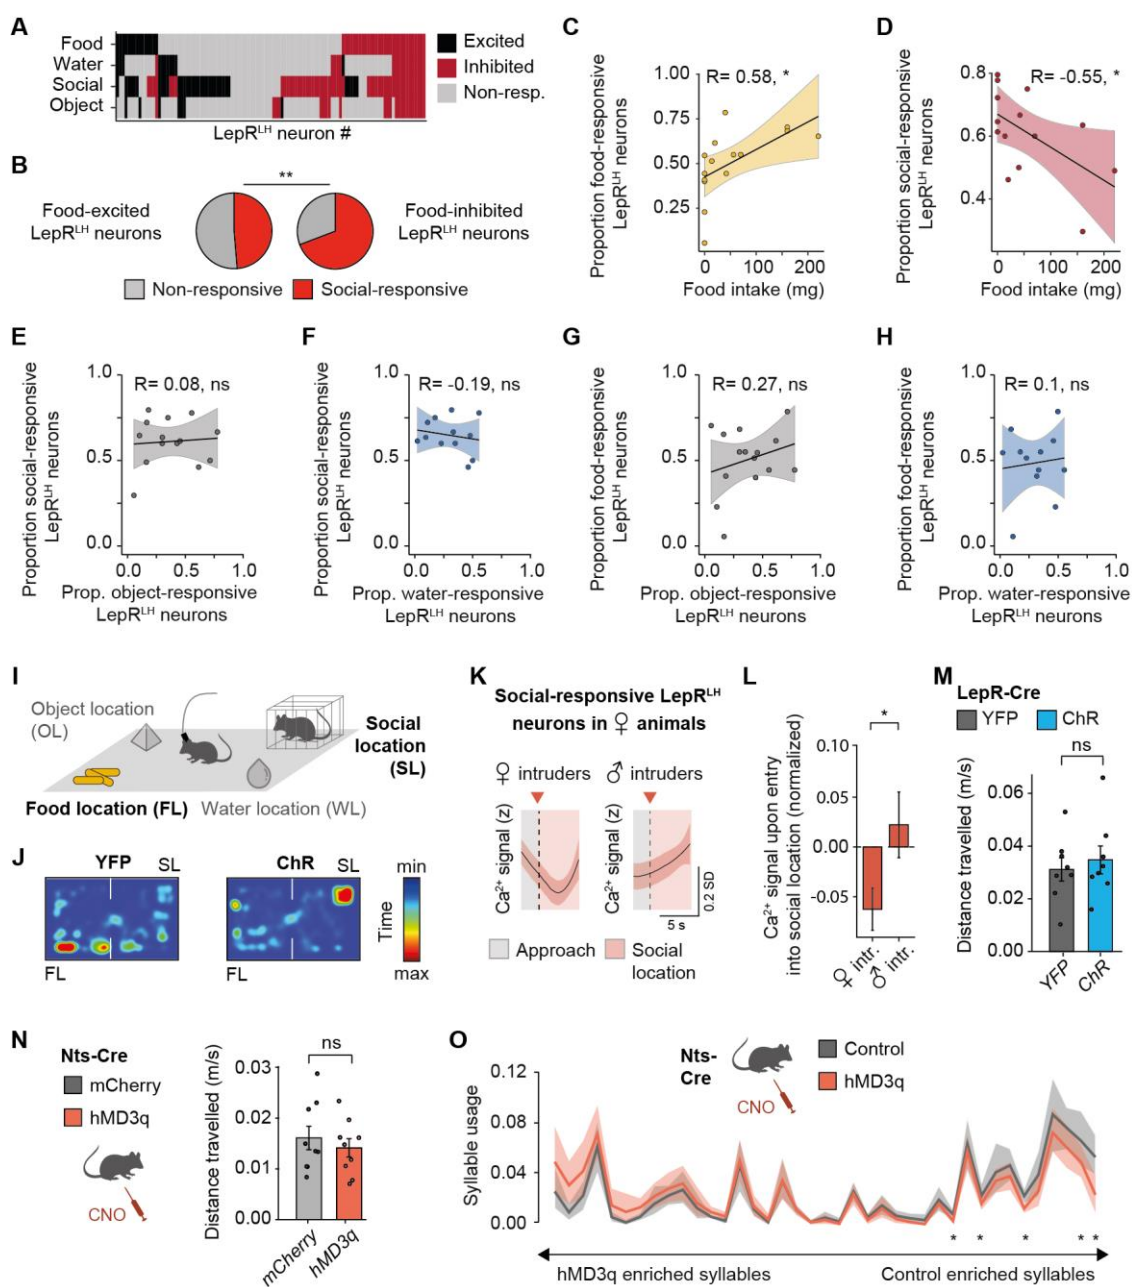

**Figure S7. Contribution of LepR<sup>LH</sup> and Nts<sup>LH</sup> neurons to social behaviors. Related to Figs. 6 and 7.**

- (A) Stimulus selectivity of individual LepR<sup>LH</sup> neurons across three states (sated, acute food restriction, chronic food restriction), n = 357 neurons.
- (B) Proportion of social-responsive neurons, \*\* P = 0.0017, Pearson's  $\chi^2$  test.
- (C,D) Food intake and proportion of (C) food-responsive neurons, \* P = 0.023, or (D) social-responsive neurons, \* P = 0.041, Pearson's correlation.
- (E,F) Proportion of social-responsive and (E) object-responsive, ns, or (F) water-responsive neurons, ns, Pearson's correlation.
- (G,H) Proportion of food-responsive and (G) object-responsive, ns, or (H) water-responsive neurons, ns, Pearson's correlation.
- (I) Enclosure (30 x 50 cm) with free access to a food (FL), water (WL), object (OL), and social location (SL).
- (J) Representative heatmap of zone occupation in the free access enclosure during optogenetic activation of LepR<sup>LH</sup> neurons following acute food restriction.
- (K) Ca<sup>2+</sup> signal around entry (dashed line) into SL; female intruders' session: n = 21 neurons, 5 mice; male intruders' session: n = 23 neurons, 6 mice, GAM fit.
- (L) Ca<sup>2+</sup> signal upon entry into social location, normalized to approach phase. \* P = 0.0357, Mann-Whitney U test.
- (M) Optogenetic activation and locomotion. YFP: n = 8 mice; ChR: n = 8 mice. ns, Student's t-test.
- (N,O) Nts<sup>LH</sup> neurons. Chemogenetic activation, control: n = 9 mice; hM3Dq: n = 9 mice.
- (N) Locomotion. ns, Student's t-test.
- (O) Behavioral syllable usage in social zone sorted by group. Average syllable usage per animal calculated using bootstrap estimation. Bootstrap estimates (n = 1000): mean indicated with solid lines, 95% confidence interval indicated with fainter lines. \* P < 0.05, z-test on bootstrapped syllable usage distributions (one test/syllable) with Hochberg correction.
- Data shown are mean  $\pm$  SEM. ns – not significant, \* P < 0.05, \*\* P < 0.01, \*\*\* P < 0.001.
-

**Figure S8**

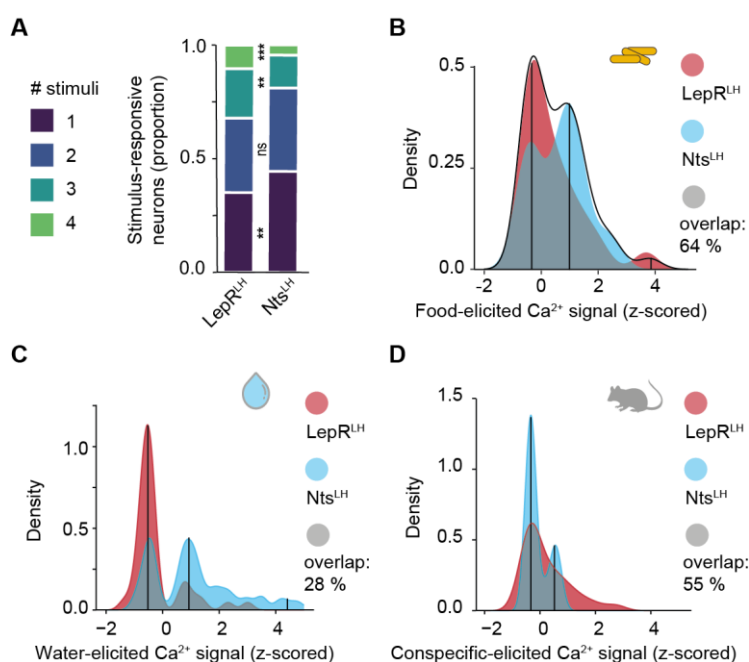

**Figure S8. Multimodal responses of LepR<sup>LH</sup> and Nts<sup>LH</sup> neurons to nutritional and non-nutritional rewards. Related to Figs. 3, 4 and 7.**

(A) Selectivity for four stimuli (food, water, conspecific, object) across three states (sated, acute food restriction, chronic food restriction). LepR<sup>LH</sup>, n = 443; Nts<sup>LH</sup>, n = 717 neurons.

(B) Population density of food-elicited responses from food-responsive neurons registered across sated and acute food restriction state, n = 96 neurons, P = 0.044, excess mass test with kernel density estimation.

(C) Population density of water-elicited responses from water-modulated neurons, n = 130 neurons, P < 0.001, as in (B).

(D) Population density of conspecific-elicited responses from social-responsive neurons, n = 161 neurons, P = 0.018, as in (B).
